# Supplementary material for: Bioinformatic Workflows for Generating Complete Plastid Genome Sequences—An Example from Cabomba (Cabombaceae) in the Context of the Phylogenomic Analysis of the Water-Lily Clade
Source: MDPI journal article supplement (doi:10.3390/life8030025), 2018-06-21
Supplement: s1 [file s1]

```
#!/bin/bash

# AUTHOR="Michael Gruenstaeudl, PhD"
# COPYRIGHT="Copyright (C) 2016-2018 $AUTHOR"
# CONTACT="m.gruenstaeudl@fu-berlin.de"
# VERSION="2018.04.05.1800"
# USAGE="bash Script8.sh $INF_CPGAVAS $INF_DOGMA $FINAL_ASMBLY $IRB $IRA"

#####
# SUPPLEMENTARY FILE 8
# Bash script to combine the annotations produced by the annotation
# servers DOGMA (http://dogma.ccbb.utexas.edu/) and cpGAVAS
# (http://www.herbalgenomics.org/cpgavas/) and to generate a union set
# of the combined annotations.
#####

# Check if sufficient commandline parameters
numArgmts=$#
if [ ! $numArgmts -eq 1 ]; then
    echo "ERROR | Incorrect number of commandline parameters" >&2
    exit 1
fi

# Check if input files exist
for v in "$@"; do
    if [ ! -f "$v" ]; then
        echo "ERROR | File not found: $v" >&2
        exit 1
    fi
done

# Check if dependencies exist
DEPS=( )
for d in "${DEPS[@]"; do
    if [ ! -x "$(command -v $d)" ]; then
        echo "Error: $d is not installed" >&2
        exit 1
    fi
done

# Assigning commandline arguments
INF_CPGAVAS=$1
INF_DOGMA=$2
FINAL_ASMBLY=$3
IRB=$4
IRA=$5

#####

# Defining temporary files and outfiles
TMP1_DOGMA=${INF_DOGMA%.gff*}.SeqnameReplaced.gff
TMP2_DOGMA=${INF_DOGMA%.gff*}.split.
TMP2_CPGAVAS=${INF_CPGAVAS%.gff*}.split.
TMP3=${INF_CPGAVAS%.gff*}.combined.gff
OUTF=${INF_CPGAVAS%.gff*}.unionSet.gff

#####
## Combining annotations of DOGMA and of cpGAVAS
#####
SEQNAME_CPGAVAS=$(grep ">" $INF_CPGAVAS | tr -d ">")
SEQNAME_DOGMA=$(grep ">" $INF_DOGMA | tr -d ">")
# Replace sequence name in DOGMA.gff-file with sequence name of cpGAVAS.gff-file
sed "s/$SEQNAME_DOGMA/$SEQNAME_CPGAVAS/g" $INF_DOGMA > $TMP1_DOGMA
# Split cpGAVAS.gff-file at keyword "##FASTA"
csplit $INF_CPGAVAS --prefix=$TMP2_CPGAVAS -q '/^##FASTA/'
# Split DOGMA.gff-file at keyword "##FASTA"
csplit $TMP1_DOGMA --prefix=$TMP2_DOGMA -q '/^##FASTA/'
# Reassemble cpGAVAS.gff-file-part1, DOGMA.gff-file-part1 and cpGAVAS.gff-file-part2
cat "${TMP2_CPGAVAS}00" > $TMP3
cat "${TMP2_DOGMA}00" >> $TMP3
cat "${TMP2_CPGAVAS}01" >> $TMP3
```

```
#####
## Main operations
#####
grep -v "#" $TMP3 | sed 's/\t/_/4' > tmp
RANGES=$(sort -k4 -n tmp | awk '{print $4}' | uniq)
mkdir -p temp
for i in $RANGES; do
    grep $'\t'$i$'\t' tmp > temp/l$i.txt;
done
for f in $(ls temp/l*.txt); do
    grep -i -m 1 $'\t'CDS$'\t' $f > tmp
    grep -i -m 1 $'\t'cds$'\t' $f > tmp
    grep -i -m 1 $'\t'exon$'\t' $f >> tmp
    grep -i -m 1 $'\t'gene$'\t' $f >> tmp
    grep -i -m 1 $'\t'intron$'\t' $f >> tmp
    grep -i -m 1 $'\t'tRNA_primary_transcript$'\t' $f >> tmp
    grep -i -m 1 $'\t'tRNA$'\t' $f >> tmp
    grep -i -m 1 $'\t'rRNA$'\t' $f >> tmp
    grep -i -m 1 $'\t'motif$'\t' $f >> tmp
    grep -i $'\t'repeat_region$'\t' $f >> tmp
    grep -i $'\t'misc_feature$'\t' $f >> tmp
    grep -i $'\t'region$'\t' $f >> tmp
    mv tmp $f
done
cat temp/l*.txt > tmp
awk -v FPAT='("[^"]*"|"[^[:blank:]]")+)' -v OFS='\t' '{gsub("_", "\t", $4); print $0}'
' tmp > tmp2 && mv tmp2 tmp
sort -k4,5 -n tmp > tmp2 && mv tmp2 tmp
awk -v FPAT='("[^"]*"|"[^[:blank:]]")+)' -v OFS='\t' '{ $2="maker"; print}' tmp > tmp2
&& mv tmp2 tmp
awk -v FPAT='("[^"]*"|"[^[:blank:]]")+)' -v OFS='\t' '{ $6="."; print}' tmp > tmp2 &&
mv tmp2 tmp
sed -i 's/;/ID=.*// ' tmp
awk -v FPAT='("[^"]*"|"[^[:blank:]]")+)' -v OFS='\t' '{ $9=$9; Annotation=$9; print}'
tmp > tmp2 && mv tmp2 tmp
sed -i 's/=Name=/\=/ ' tmp
sed -i 's/(Name=trn.)/\1-/ ' tmp
sed -i 's/(Annotation=trn.)/\1-/ ' tmp
sed -i 's/--/-/ ' tmp

python2.7 - <<EOF
import re
with open("tmp", "r+") as f:
    lines = f.read().splitlines()
    outL = []
    kw = "=trn"
    for l in lines:
        if kw in l:
            pos = [m.end()+2 for m in re.finditer("=trn", l)]
            for p in pos:
                l = l[:p] + l[p:p+3].replace("U","T") + l[p+3:]
            outL.append(l)
        else:
            outL.append(l)
    f.seek(0)
    f.write('\n'.join(outL))
    f.truncate()
EOF

sed -i 's/trnf\MCAU/trnf\MCAT/g' tmp

python2.7 - <<EOF
with open("tmp", "r+") as f:
    lines = f.read().splitlines()
    outL = []
    for l in lines:
        annotyp = l.split("\t")[2]
        if l[-5:] == " gene" and annotyp == "gene":
            outL.append(l[:-5])
        elif l[-7:] == " intron" and annotyp == "intron":
            outL.append(l[:-7])
        elif l[-7:-1] == " exon " and annotyp == "exon" and "number=" not in l:
            outL.append(l[:-7]+" ;number="+l[-1:])

```

```

        else:
            outL.append(l)
    f.seek(0)
    f.write('\n'.join(outL))
    f.truncate()
EOF

grep -v "#" $FINAL_ASMBLY > tmp3

python2.7 - <<EOF
import re
with open("tmp3", "r") as f:
    lines = f.read().splitlines()
    annoDict = {}
    for l in lines:
        li = re.split(r'(;|\t)', l)
        #li = re.split(r'[:,\s]\s*', l)
        if any("Name=" and "product=" in e for e in li):
            n = [e for e in li if "Name=" in e][0]
            a_name = n[n.find("Name=")+len("Name="):]
            p = [e for e in li if "product=" in e][0]
            a_prod = p[p.find("product=")+len("product="):]
            annoDict[a_name] = a_prod
    f.close()
with open("tmp", "r+") as f:
    lines = f.read().splitlines()
    outL = []
    for l in lines:
        annotyp = l.split()[2]
        if annotyp != "intron":
            li = re.split(r'(;|\t)', l)
            #li = re.split(r'[:,\s]\s*', l)
            if any("Name=" in e for e in li):
                n = [e for e in li if "Name=" in e][0]
                a_name = n[n.find("Name=")+len("Name="):]
                kw = n[n.find("Name="):]
                if a_name in annoDict.keys() and kw in l:
                    # "product" in tfl must start w. small letter
                    nl = l + ";product=" + annoDict[a_name]
                    outL.append(nl)
            else:
                outL.append(l)
        else:
            outL.append(l)
    f.seek(0)
    f.write('\n'.join(outL))
    f.truncate()
EOF

awk -v FPAT='("[^"]*"|"[^:blank:]"")+)' -v OFS='\t' '{if ($3=="intron") $7="."; print}' tmp > tmp2 && mv tmp2 tmp
sed -i 's/tRNA_primary_transcript/tRNA/' tmp

python2.7 - <<EOF
ira = $IRA
ira = [int(x) for x in list(ira)]
irb = $IRB
irb = [int(x) for x in list(irb)]
with open("tmp", "r+") as f:
    lines = f.read().splitlines()
    outL = []
    for l in lines:
        li = l.split("\t")
        tags = "".join(li[8:]).split(";")
        tagD = {}
        for t in tags:
            if "=" in t:
                i = t.split("=")
                tagD[i[0]] = i[1] # Dict. saves only unique keys
        startp = int(li[3])
        stopp = int(li[4])
        if min(ira) <= startp <= max(ira) or min(ira) <= stopp <= max(ira):
            tagD["Name"] = tagD["Name"] + "_IRa"

```

```

    if min(irb) <= startp <= max(irb) or min(irb) <= stopp <= max(irb):
        tagD["Name"] = tagD["Name"] + "_IRb"
    #del tagD["createdby"]
    tagL = []
    for k,v in tagD.items():
        tagL.append(k+"="+v)
    nl = "\t".join(li[:8]) + "\t" + ";".join(tagL)
    outL.append(nl)
f.seek(0)
f.write('\n'.join(outL))
f.truncate()
EOF

```

```

python2.7 - <<EOF
with open("tmp", "r+") as f:
    lines = f.read().splitlines()
    outL = []
    for l in lines:
        li = l.split("\t")
        tags = "".join(li[8:]).split(";")
        tagD = {}
        for t in tags:
            if "=" in t:
                i = t.split("=")
                tagD[i[0]] = i[1] # Dict. saves only unique keys
        if li[2] == "exon" and "number" in tagD:
            del tagD["number"]
        tagL = []
        for k,v in tagD.items():
            tagL.append(k+"="+v)
        nl = "\t".join(li[:8]) + "\t" + ";".join(tagL)
        outL.append(nl)
    f.seek(0)
    f.write('\n'.join(outL))
    f.truncate()
EOF

```

```

sed -i 's/--/--/' tmp
sed -i 's/exon1/_exon_1/g' tmp
sed -i 's/exon1/_exon_2/g' tmp
sed -i 's/NCBIFeatureKey/NCBI Feature Key/g' tmp
sed -i 's/NCBIJoinType/NCBI Join Type/g' tmp
awk '{print $0";"}' tmp > tmp2 && mv tmp2 tmp

```

```

perl -pi -le 's/(Annotation=.*?)CDS(.*?)/$1$2/' tmp
perl -pi -le 's/(Annotation=.*?)gene(.*?)/$1$2/' tmp
perl -pi -le 's/(Annotation=.*?)exon1(.*?)/$1$2/' tmp
perl -pi -le 's/(Annotation=.*?)exon2(.*?)/$1$2/' tmp
perl -pi -le 's/(Annotation=.*?)exon3(.*?)/$1$2/' tmp
perl -pi -le 's/(Annotation=.*?)exon(.*?)/$1$2/' tmp
perl -pi -le 's/(Annotation=.*?)intron1(.*?)/$1$2/' tmp
perl -pi -le 's/(Annotation=.*?)intron2(.*?)/$1$2/' tmp
perl -pi -le 's/(Annotation=.*?)intron3(.*?)/$1$2/' tmp
perl -pi -le 's/(Annotation=.*?)intron(.*?)/$1$2/' tmp
perl -pi -le 's/(Annotation=.*?)tRNA(.*?)/$1$2/' tmp

```

```

sed -i 's/ ;/;/g' tmp
awk '{print substr($0, 1, length($0)-1)}' tmp > tmp2 && mv tmp2 tmp

```

```

# Assembling output file
grep "^#" $TMP3 | grep -v "FASTA" > $OUTF
cat tmp >> $OUTF
grep single_copy_region $TMP3 >> $OUTF
cat ${TMP2_CPGAVAS}01 >> $OUTF

```

```

# File hygiene
rm tmp
#rm tmp2
rm tmp3
rm $TMP1_DOGMA
rm ${TMP2_DOGMA}0*
rm ${TMP2_CPGAVAS}0*

```

```
rm $TMP3  
rm -r temp/  
  
#EOF
```
