# Supplementary figures and images for: Bioinformatic Workflows for Generating Complete Plastid Genome Sequences—An Example from Cabomba (Cabombaceae) in the Context of the Phylogenomic Analysis of the Water-Lily Clade
Source: MDPI journal article supplement (doi:10.3390/life8030025), 2018-06-21

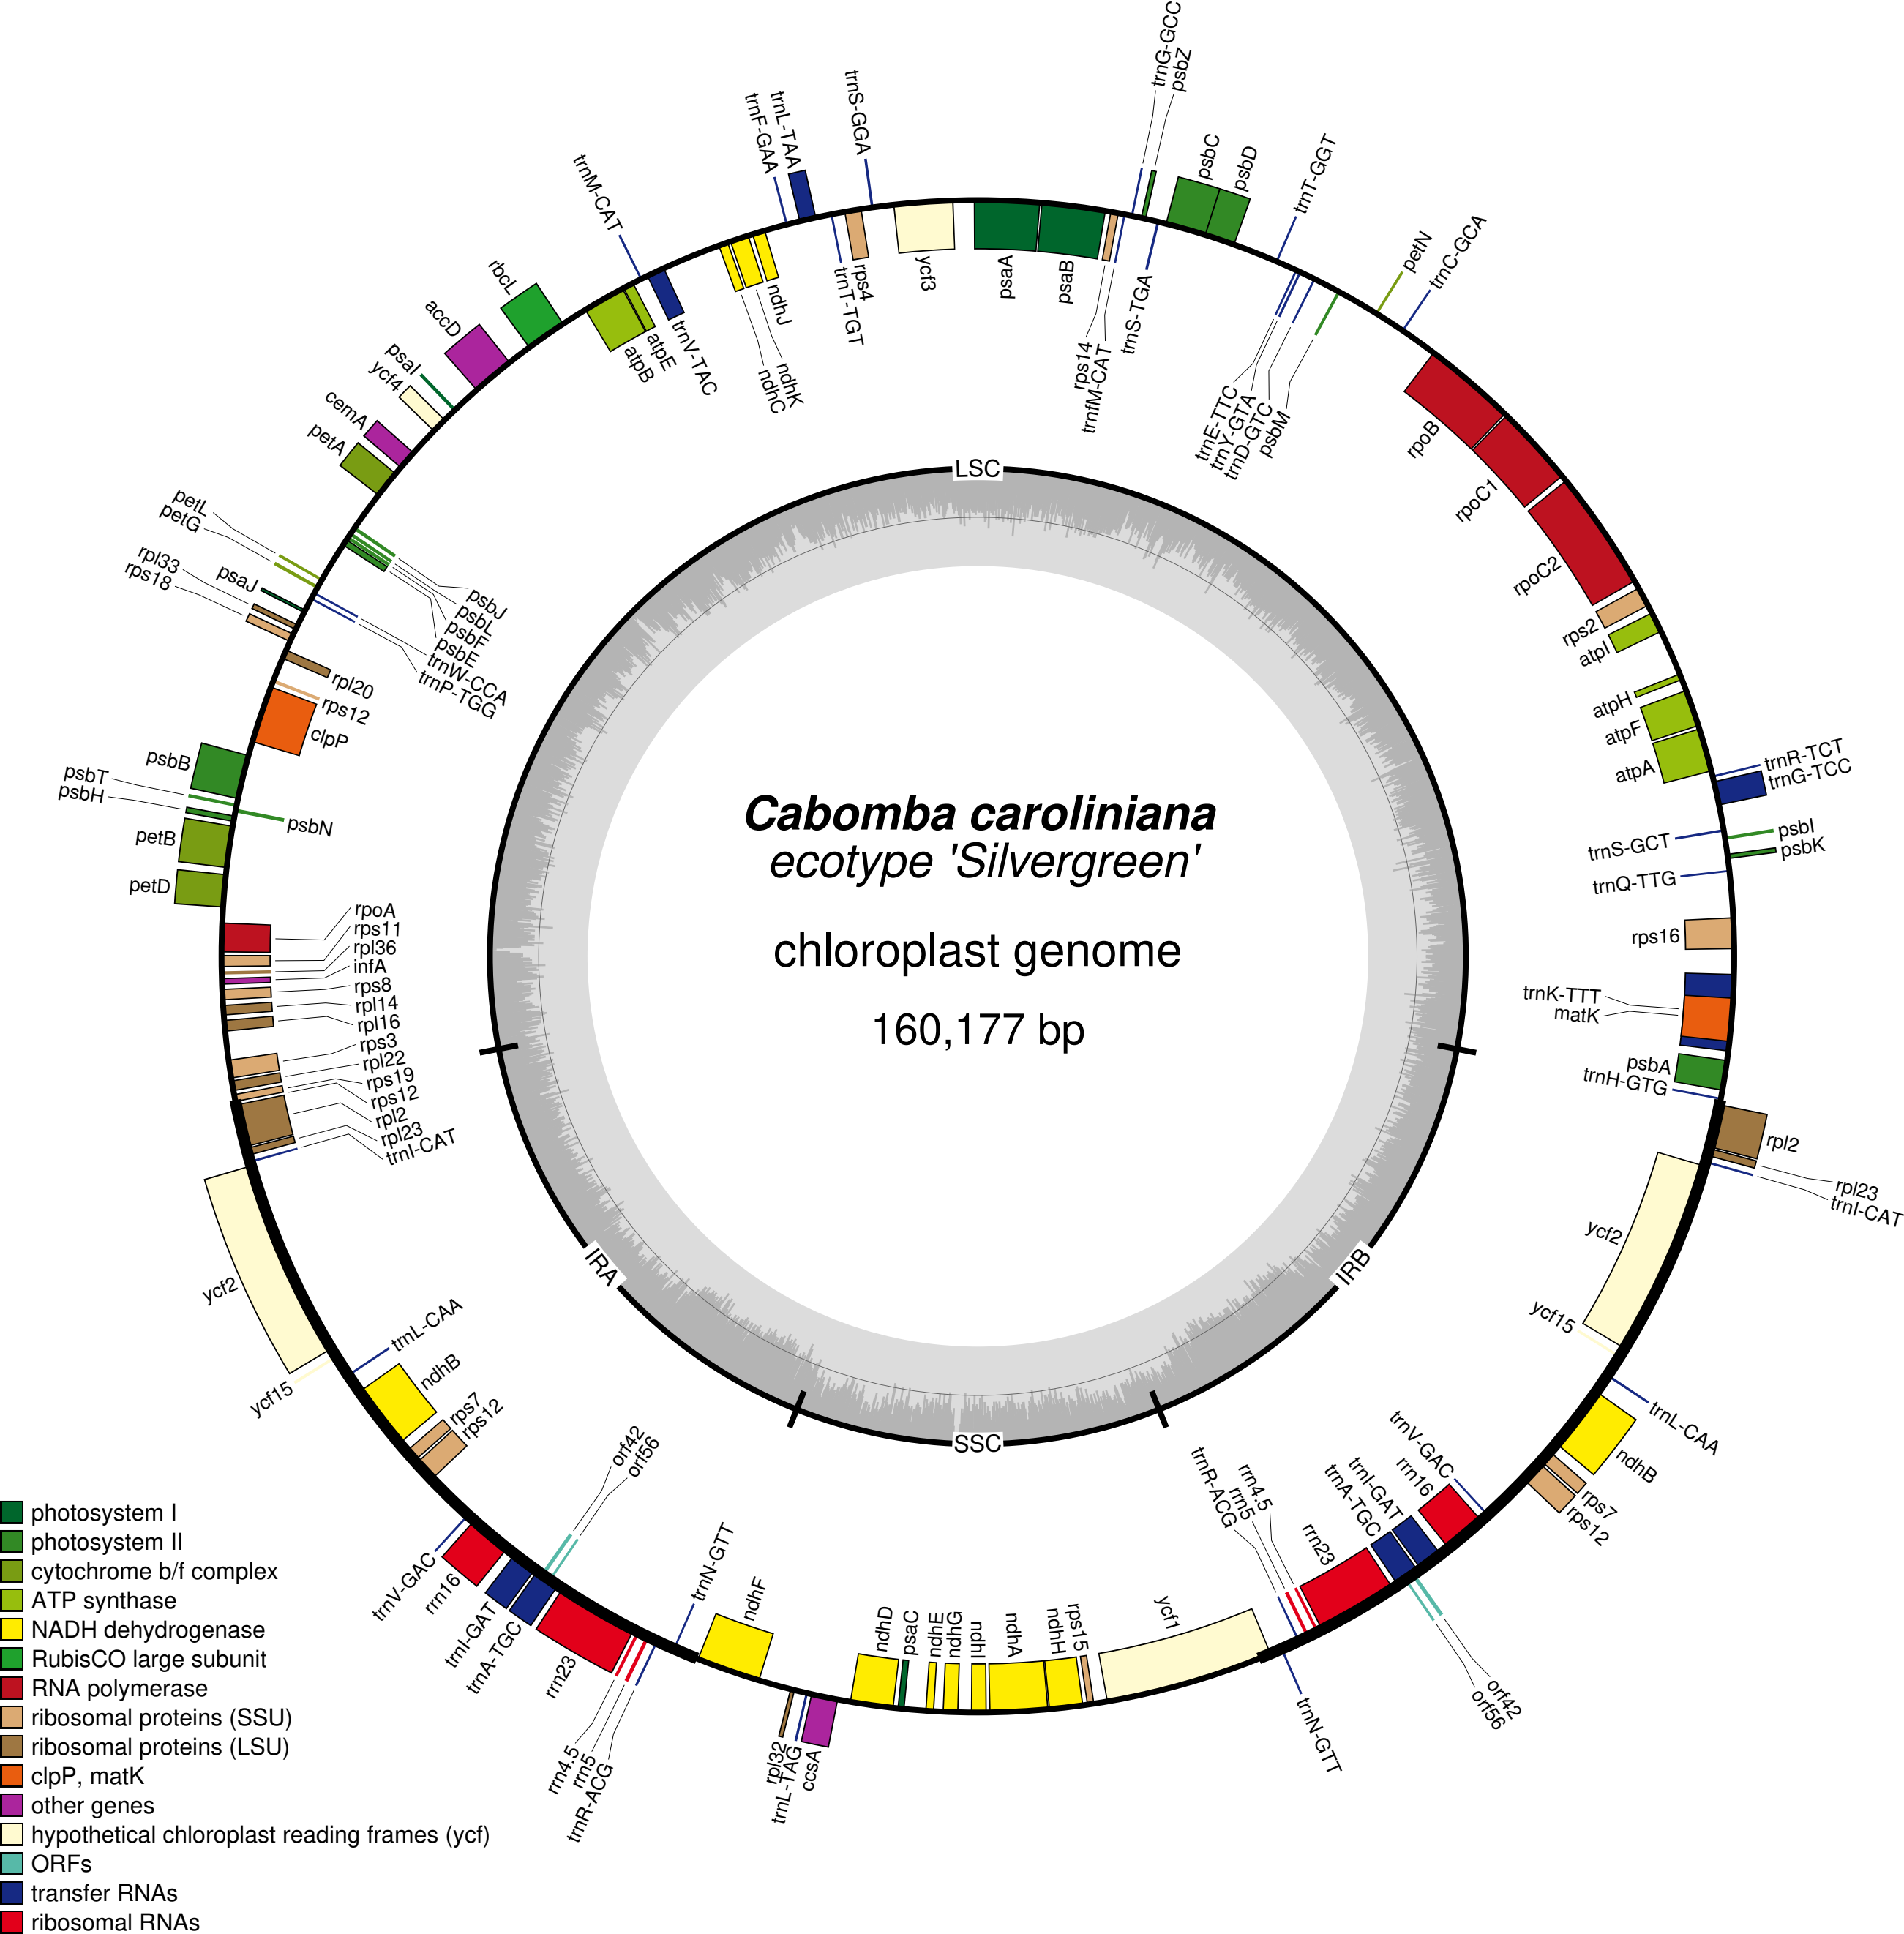

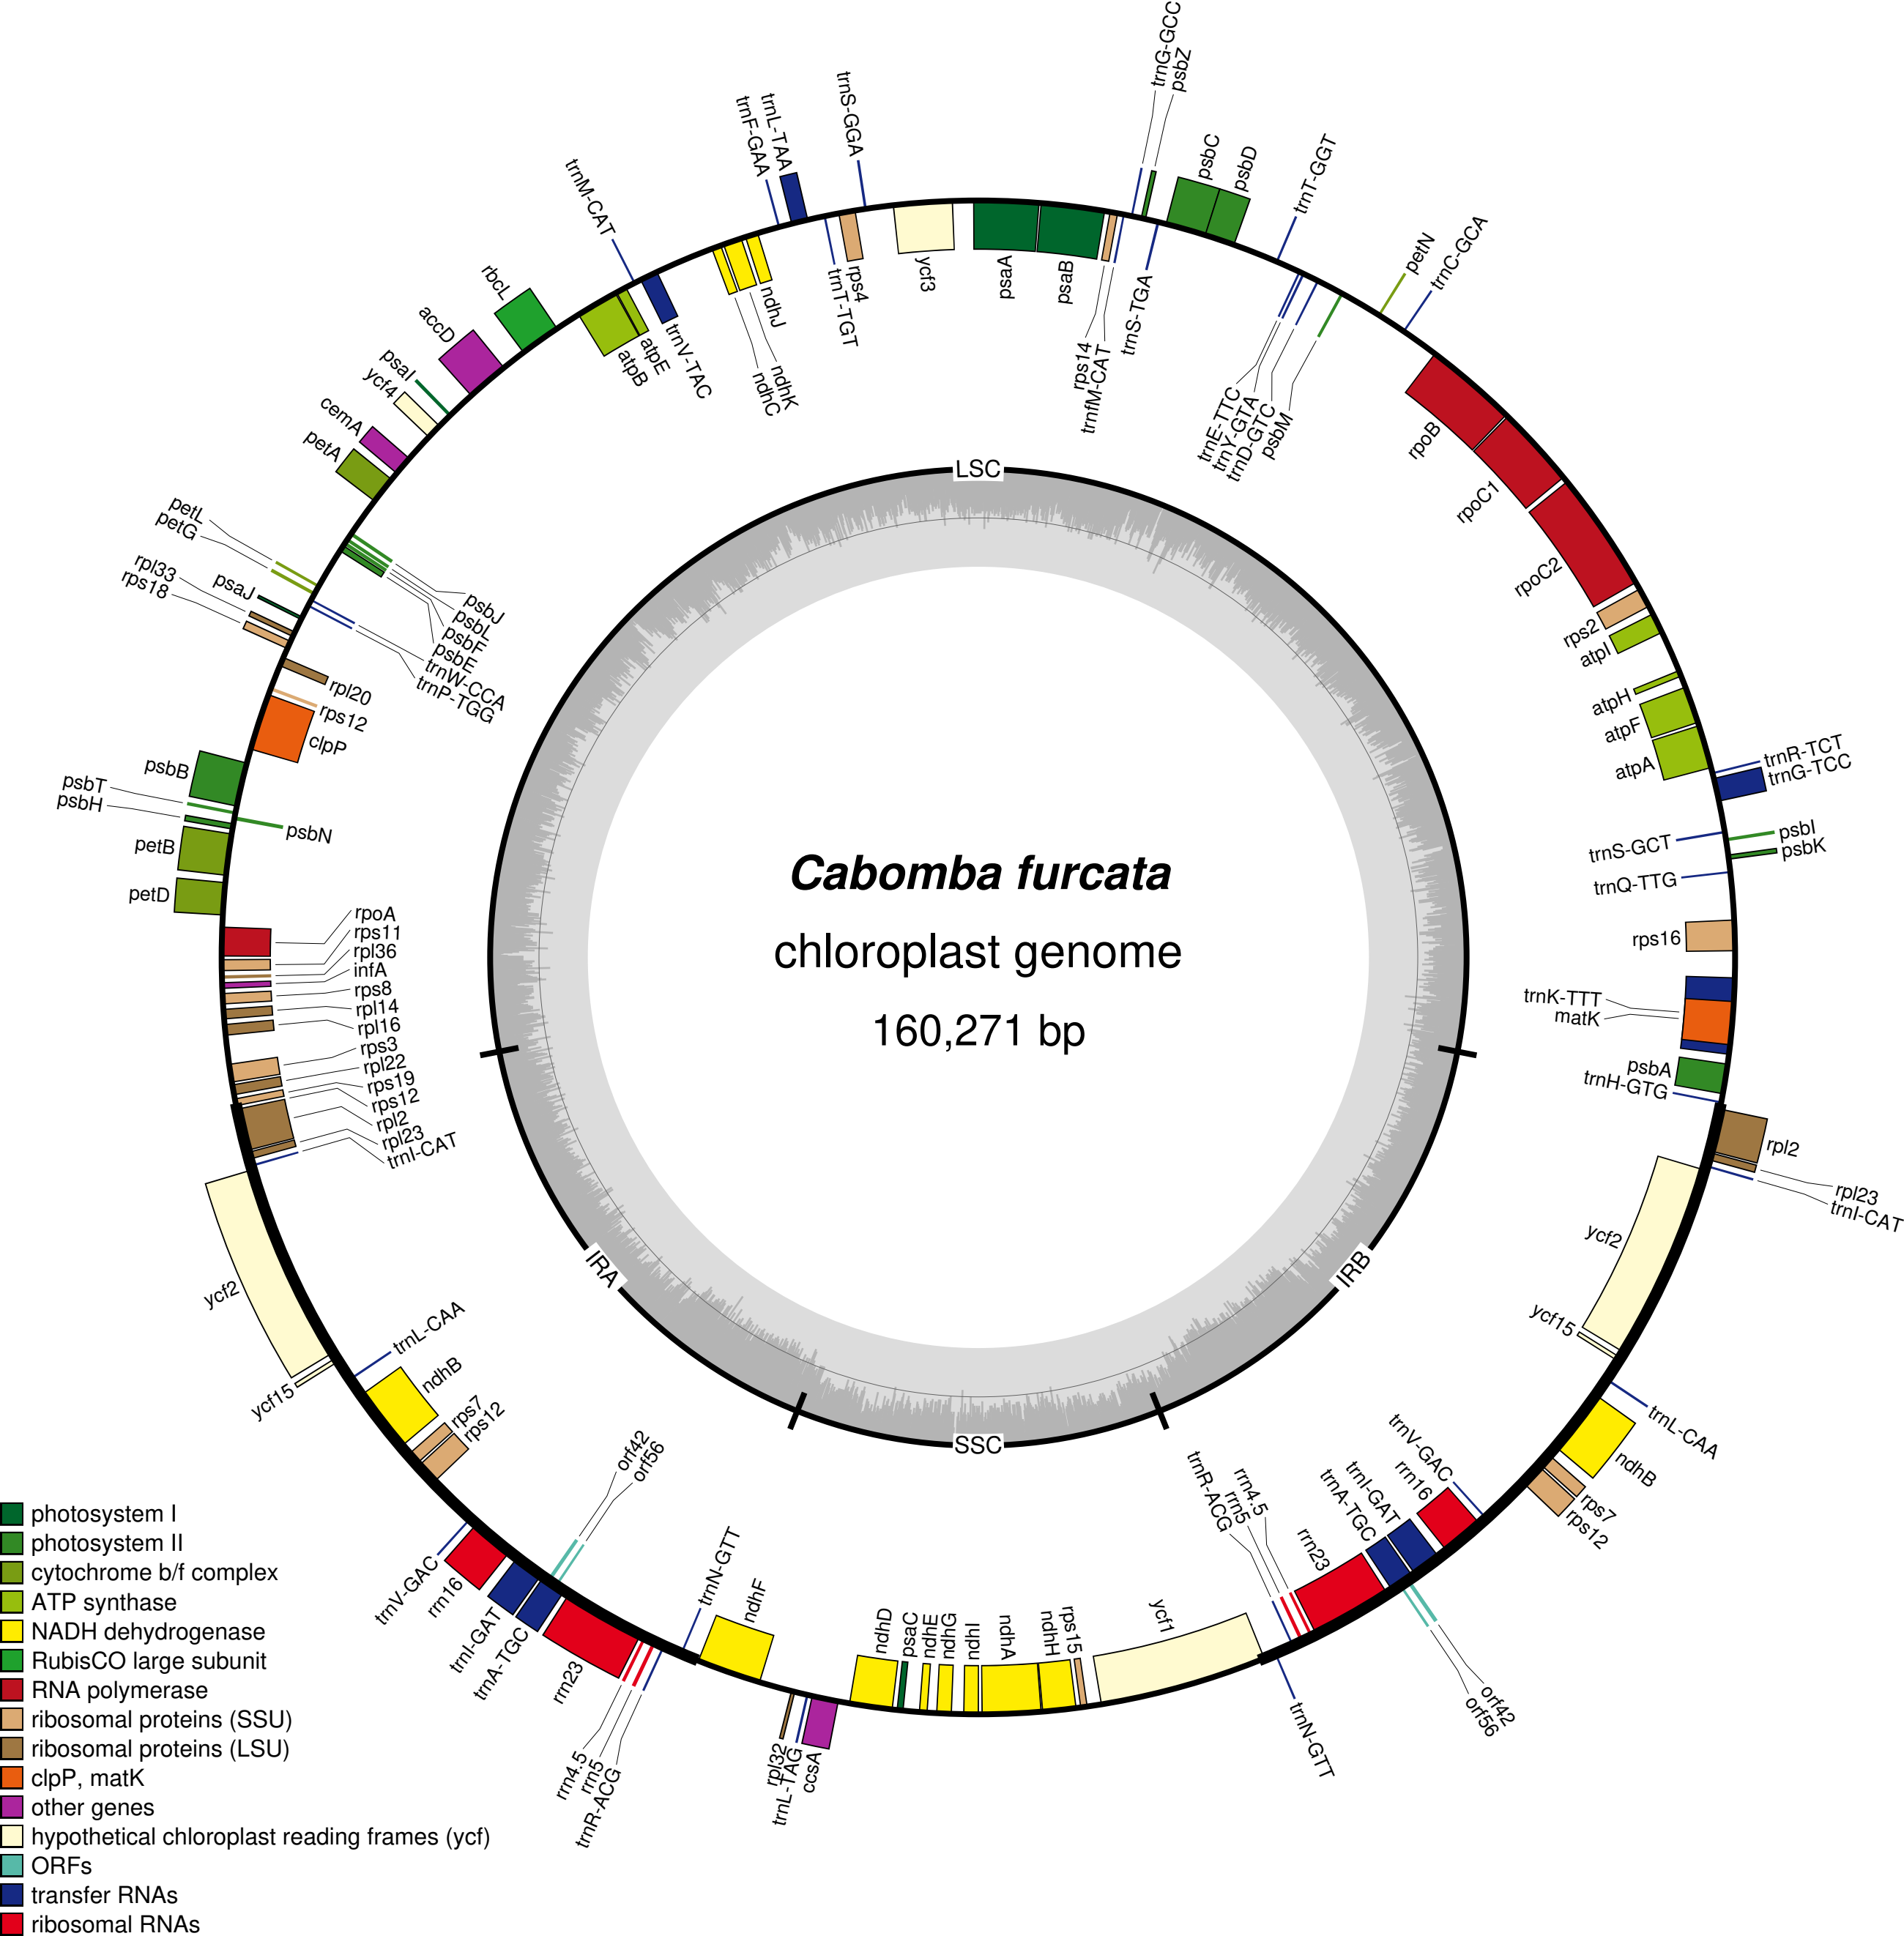

Supplement: s1 [file s1]
